# Supplementary material
Source: publisher site journal article supplement (https://www.spandidos-publications.com/6032/downloadSupplementary)
Supplement: Supplementary file 1 [file downloadSupplementary]

## Sheet: classical_SAHA_up_BP
Supplementary Table VII: Top 100 GO terms of upregulated gene in classical cell lines (PaTu-S, Capan-1, Capan-2, Colo357) after 24h SAHA (0.5µM) treatment compared to control-treated cell lines
No	GO.ID	Term	Annotated	Significant	Expected	Rank in Fisher.classic	Fisher.elim	Fisher.classic	Venn diagram
1	GO:1902903	regulation of supramolecular fiber organ...	15	8	1.61	1	1	3.1e-05	only in classical
2	GO:0002252	immune effector process	24	10	2.57	2	0.0918	4.1e-05	only in classical
3	GO:0097435	supramolecular fiber organization	19	8	2.03	3	1	0.00026	only in classical
4	GO:0032956	regulation of actin cytoskeleton organiz...	15	7	1.61	4	0.25526	0.00032	only in classical
5	GO:0032970	regulation of actin filament-based proce...	15	7	1.61	5	0.25526	0.00032	only in classical
6	GO:0016192	vesicle-mediated transport	54	14	5.78	6	1	0.0004	overlapping with basal-like
7	GO:0002443	leukocyte mediated immunity	16	7	1.71	7	0.00052	0.00052	only in classical
8	GO:0110053	regulation of actin filament organizatio...	12	6	1.28	8	0.00059	0.00059	only in classical
9	GO:0045055	regulated exocytosis	17	7	1.82	9	0.00082	0.00082	only in classical
10	GO:0051493	regulation of cytoskeleton organization	22	8	2.35	10	0.2371	0.00087	only in classical
11	GO:0007010	cytoskeleton organization	33	10	3.53	11	0.10463	0.00094	only in classical
12	GO:0007015	actin filament organization	13	6	1.39	12	1	0.001	only in classical
13	GO:0032940	secretion by cell	28	9	3	13	0.26683	0.00111	only in classical
14	GO:0038127	ERBB signaling pathway	6	4	0.64	14	0.1	0.00145	only in classical
15	GO:0007173	epidermal growth factor receptor signali...	6	4	0.64	15	0.1	0.00145	only in classical
16	GO:0006909	phagocytosis	6	4	0.64	16	0.00145	0.00145	only in classical
17	GO:1902904	negative regulation of supramolecular fi...	6	4	0.64	17	0.00145	0.00145	only in classical
18	GO:0044087	regulation of cellular component biogene...	29	9	3.1	18	0.57477	0.00149	only in classical
19	GO:0006897	endocytosis	19	7	2.03	19	0.0018	0.0018	only in classical
20	GO:0044089	positive regulation of cellular componen...	19	7	2.03	20	0.0018	0.0018	only in classical
21	GO:0048583	regulation of response to stimulus	91	18	9.74	21	0.09112	0.0018	only in classical
22	GO:2000116	regulation of cysteine-type endopeptidas...	10	5	1.07	22	1	0.00184	only in classical
23	GO:1902905	positive regulation of supramolecular fi...	10	5	1.07	23	0.00184	0.00184	only in classical
24	GO:0046903	secretion	30	9	3.21	24	0.33851	0.00196	only in classical
25	GO:0140352	export from cell	30	9	3.21	25	0.33851	0.00196	only in classical
26	GO:0065008	regulation of biological quality	84	17	8.99	26	0.03424	0.002	only in classical
27	GO:0001775	cell activation	25	8	2.68	27	0.24029	0.00231	only in classical
28	GO:0050776	regulation of immune response	15	6	1.61	28	0.26244	0.00248	only in classical
29	GO:0002274	myeloid leukocyte activation	15	6	1.61	29	0.00248	0.00248	only in classical
30	GO:0006887	exocytosis	20	7	2.14	30	1	0.00255	only in classical
31	GO:0022610	biological adhesion	32	9	3.43	31	1	0.00326	only in classical
32	GO:0007155	cell adhesion	32	9	3.43	32	0.00326	0.00326	only in classical
33	GO:0030036	actin cytoskeleton organization	21	7	2.25	33	0.54819	0.00352	only in classical
34	GO:0010639	negative regulation of organelle organiz...	16	6	1.71	34	0.08644	0.00365	only in classical
35	GO:0043254	regulation of protein-containing complex...	16	6	1.71	35	0.08644	0.00365	only in classical
36	GO:0052548	regulation of endopeptidase activity	16	6	1.71	36	0.45551	0.00365	only in classical
37	GO:0090066	regulation of anatomical structure size	16	6	1.71	37	0.00365	0.00365	overlapping with basal-like
38	GO:0002376	immune system process	59	13	6.32	38	0.88905	0.00394	overlapping with basal-like
39	GO:0006955	immune response	39	10	4.17	39	0.09132	0.00397	overlapping with basal-like
40	GO:0051234	establishment of localization	114	20	12.2	40	0.54666	0.0045	only in classical
41	GO:0051129	negative regulation of cellular componen...	22	7	2.35	41	0.19642	0.00475	only in classical
42	GO:0030029	actin filament-based process	22	7	2.35	42	0.59148	0.00475	only in classical
43	GO:0045321	leukocyte activation	22	7	2.35	43	0.50263	0.00475	only in classical
44	GO:0002253	activation of immune response	12	5	1.28	44	0.00491	0.00491	only in classical
45	GO:0014070	response to organic cyclic compound	17	6	1.82	45	0.0052	0.0052	only in classical
46	GO:0052547	regulation of peptidase activity	17	6	1.82	46	0.50851	0.0052	only in classical
47	GO:2001056	positive regulation of cysteine-type end...	8	4	0.86	47	0.00576	0.00576	only in classical
48	GO:0006959	humoral immune response	8	4	0.86	48	0.00576	0.00576	only in classical
49	GO:0030162	regulation of proteolysis	23	7	2.46	49	0.35833	0.00629	only in classical
50	GO:0010646	regulation of cell communication	77	15	8.24	50	0.03373	0.00657	only in classical
51	GO:0006810	transport	109	19	11.67	51	0.6701	0.00672	only in classical
52	GO:0007169	transmembrane receptor protein tyrosine ...	18	6	1.93	52	0.13035	0.00718	only in classical
53	GO:0048856	anatomical structure development	118	20	12.63	53	0.02598	0.00721	overlapping with basal-like
54	GO:0050778	positive regulation of immune response	13	5	1.39	54	1	0.00735	only in classical
55	GO:0023051	regulation of signaling	78	15	8.35	55	0.03747	0.00753	only in classical
56	GO:0002682	regulation of immune system process	24	7	2.57	56	0.28744	0.00818	only in classical
57	GO:0051128	regulation of cellular component organiz...	64	13	6.85	57	0.44046	0.00862	overlapping with basal-like
58	GO:0048584	positive regulation of response to stimu...	43	10	4.6	58	0.16366	0.00865	only in classical
59	GO:0050896	response to stimulus	184	27	19.7	59	0.22907	0.00902	only in classical
60	GO:0043281	regulation of cysteine-type endopeptidas...	9	4	0.96	60	0.00956	0.00956	only in classical
61	GO:0007611	learning or memory	9	4	0.96	61	0.00956	0.00956	only in classical
62	GO:0050900	leukocyte migration	9	4	0.96	62	0.00956	0.00956	only in classical
63	GO:0003008	system process	37	9	3.96	63	0.12587	0.00961	only in classical
64	GO:0031032	actomyosin structure organization	5	3	0.54	64	0.00977	0.00977	only in classical
65	GO:0002697	regulation of immune effector process	5	3	0.54	65	0.00977	0.00977	only in classical
66	GO:0031333	negative regulation of protein-containin...	5	3	0.54	66	0.00977	0.00977	only in classical
67	GO:0042058	regulation of epidermal growth factor re...	5	3	0.54	67	0.00977	0.00977	only in classical
68	GO:1901184	regulation of ERBB signaling pathway	5	3	0.54	68	1	0.00977	only in classical
69	GO:0021782	glial cell development	5	3	0.54	69	0.00977	0.00977	only in classical
70	GO:0051494	negative regulation of cytoskeleton orga...	5	3	0.54	70	0.00977	0.00977	only in classical
71	GO:0002460	adaptive immune response based on somati...	5	3	0.54	71	0.00977	0.00977	only in classical
72	GO:1901216	positive regulation of neuron death	5	3	0.54	72	0.00977	0.00977	only in classical
73	GO:0007167	enzyme linked receptor protein signaling...	25	7	2.68	73	0.12705	0.01046	only in classical
74	GO:0007166	cell surface receptor signaling pathway	51	11	5.46	74	0.06947	0.01053	overlapping with basal-like
75	GO:0051179	localization	149	23	15.95	75	0.66855	0.01176	only in classical
76	GO:0033043	regulation of organelle organization	45	10	4.82	76	0.37077	0.01222	only in classical
77	GO:0070925	organelle assembly	26	7	2.78	77	0.01318	0.01318	only in classical
78	GO:0009653	anatomical structure morphogenesis	53	11	5.67	78	0.01433	0.01433	only in classical
79	GO:0007399	nervous system development	46	10	4.92	79	0.09674	0.01439	only in classical
80	GO:0045087	innate immune response	15	5	1.61	80	0.01457	0.01457	overlapping with basal-like
81	GO:0032535	regulation of cellular component size	10	4	1.07	81	0.01471	0.01471	overlapping with basal-like
82	GO:0031334	positive regulation of protein-containin...	10	4	1.07	82	0.01471	0.01471	only in classical
83	GO:0042119	neutrophil activation	10	4	1.07	83	0.01471	0.01471	only in classical
84	GO:0043312	neutrophil degranulation	10	4	1.07	84	0.01471	0.01471	only in classical
85	GO:2001233	regulation of apoptotic signaling pathwa...	10	4	1.07	85	0.01471	0.01471	only in classical
86	GO:0003012	muscle system process	10	4	1.07	86	0.01471	0.01471	only in classical
87	GO:0002283	neutrophil activation involved in immune...	10	4	1.07	87	0.01471	0.01471	only in classical
88	GO:0010950	positive regulation of endopeptidase act...	10	4	1.07	88	1	0.01471	only in classical
89	GO:0032502	developmental process	125	20	13.38	89	0.04769	0.01526	overlapping with basal-like
90	GO:0009966	regulation of signal transduction	69	13	7.39	90	0.08097	0.01703	only in classical
91	GO:0022607	cellular component assembly	77	14	8.24	91	0.07704	0.0177	only in classical
92	GO:0048731	system development	93	16	9.95	92	0.06784	0.01793	only in classical
93	GO:0006898	receptor-mediated endocytosis	6	3	0.64	93	0.0181	0.0181	only in classical
94	GO:0048167	regulation of synaptic plasticity	6	3	0.64	94	0.0181	0.0181	only in classical
95	GO:0012501	programmed cell death	55	11	5.89	95	0.1463	0.01912	overlapping with basal-like
96	GO:0002684	positive regulation of immune system pro...	16	5	1.71	96	1	0.01953	only in classical
97	GO:0045862	positive regulation of proteolysis	16	5	1.71	97	0.56564	0.01953	only in classical
98	GO:0032989	cellular component morphogenesis	16	5	1.71	98	0.01953	0.01953	only in classical
99	GO:0023052	signaling	119	19	12.74	99	0.06183	0.01982	overlapping with basal-like
100	GO:0007154	cell communication	119	19	12.74	100	0.06183	0.01982	overlapping with basal-like

## Sheet: basal-like_SAHA_up_BP
Supplementary Table 7: Top 100 GO terms of upregulated gene in basal-like cell lines (PaTu-T, PANC-1, MIAPaCa-2) after 24h SAHA (0.5µM) treatment compared to control-treated cell lines
no.	GO.ID	Term	Annotated	Significant	Expected	Rank in Fisher.classic	Fisher.elim	Fisher.classic	Venn diagram
1	GO:0044419	interspecies interaction between organis...	9	3	0.82	1	0.029	0.029	only in basal-like
2	GO:0061061	muscle structure development	5	2	0.45	2	0.061	0.061	only in basal-like
3	GO:0071495	cellular response to endogenous stimulus	5	2	0.45	3	0.061	0.061	only in basal-like
4	GO:0040007	growth	5	2	0.45	4	0.061	0.061	only in basal-like
5	GO:0009605	response to external stimulus	12	3	1.09	5	0.068	0.068	only in basal-like
6	GO:0007165	signal transduction	21	4	1.91	6	0.076	0.076	only in basal-like
7	GO:0009056	catabolic process	13	3	1.18	7	0.085	0.085	only in basal-like
8	GO:0050793	regulation of developmental process	13	3	1.18	8	0.085	0.085	only in basal-like
9	GO:0010243	response to organonitrogen compound	6	2	0.55	9	0.088	0.088	only in basal-like
10	GO:0042981	regulation of apoptotic process	6	2	0.55	10	0.088	0.088	only in basal-like
11	GO:1901698	response to nitrogen compound	6	2	0.55	11	0.088	0.088	only in basal-like
12	GO:0043067	regulation of programmed cell death	6	2	0.55	12	0.088	0.088	only in basal-like
13	GO:0034097	response to cytokine	7	2	0.64	13	0.118	0.118	only in basal-like
14	GO:0010941	regulation of cell death	7	2	0.64	14	0.118	0.118	only in basal-like
15	GO:0009607	response to biotic stimulus	7	2	0.64	15	0.118	0.118	only in basal-like
16	GO:0016192	vesicle-mediated transport	7	2	0.64	16	0.118	0.118	overlapping with classical
17	GO:0007166	cell surface receptor signaling pathway	7	2	0.64	17	0.118	0.118	overlapping with classical
18	GO:0006915	apoptotic process	7	2	0.64	18	0.118	0.118	only in basal-like
19	GO:0043207	response to external biotic stimulus	7	2	0.64	19	0.118	0.118	only in basal-like
20	GO:0051707	response to other organism	7	2	0.64	20	0.118	0.118	only in basal-like
21	GO:0006629	lipid metabolic process	7	2	0.64	21	0.118	0.118	only in basal-like
22	GO:0045087	innate immune response	7	2	0.64	22	0.118	0.118	overlapping with classical
23	GO:0012501	programmed cell death	7	2	0.64	23	0.118	0.118	overlapping with classical
24	GO:0098542	defense response to other organism	7	2	0.64	24	0.118	0.118	only in basal-like
25	GO:0023052	signaling	24	4	2.18	25	0.122	0.122	overlapping with classical
26	GO:0007154	cell communication	24	4	2.18	26	0.122	0.122	overlapping with classical
27	GO:0030154	cell differentiation	15	3	1.36	27	0.125	0.125	only in basal-like
28	GO:0048869	cellular developmental process	15	3	1.36	28	0.125	0.125	only in basal-like
29	GO:0070887	cellular response to chemical stimulus	16	3	1.45	29	0.148	0.148	only in basal-like
30	GO:0006952	defense response	8	2	0.73	30	0.151	0.151	only in basal-like
31	GO:0006468	protein phosphorylation	8	2	0.73	31	0.151	0.151	only in basal-like
32	GO:1901700	response to oxygen-containing compound	8	2	0.73	32	0.151	0.151	only in basal-like
33	GO:0008219	cell death	8	2	0.73	33	0.151	0.151	only in basal-like
34	GO:0045595	regulation of cell differentiation	8	2	0.73	34	0.151	0.151	only in basal-like
35	GO:0009719	response to endogenous stimulus	8	2	0.73	35	0.151	0.151	only in basal-like
36	GO:0010033	response to organic substance	17	3	1.55	36	0.172	0.172	only in basal-like
37	GO:0048522	positive regulation of cellular process	27	4	2.45	37	0.181	0.181	only in basal-like
38	GO:2000026	regulation of multicellular organismal d...	9	2	0.82	38	0.186	0.186	only in basal-like
39	GO:0048518	positive regulation of biological proces...	28	4	2.55	39	0.204	0.204	only in basal-like
40	GO:0051239	regulation of multicellular organismal p...	10	2	0.91	40	0.222	0.222	only in basal-like
41	GO:0006955	immune response	10	2	0.91	41	0.222	0.222	overlapping with classical
42	GO:0016310	phosphorylation	10	2	0.91	42	0.222	0.222	only in basal-like
43	GO:0044281	small molecule metabolic process	10	2	0.91	43	0.222	0.222	only in basal-like
44	GO:0050790	regulation of catalytic activity	10	2	0.91	44	0.222	0.222	only in basal-like
45	GO:1901575	organic substance catabolic process	10	2	0.91	45	0.222	0.222	only in basal-like
46	GO:0048523	negative regulation of cellular process	19	3	1.73	46	0.225	0.225	only in basal-like
47	GO:0007275	multicellular organism development	19	3	1.73	47	0.225	0.225	only in basal-like
48	GO:0048519	negative regulation of biological proces...	20	3	1.82	48	0.254	0.254	only in basal-like
49	GO:0044248	cellular catabolic process	11	2	1	49	0.26	0.26	only in basal-like
50	GO:0042221	response to chemical	21	3	1.91	50	0.284	0.284	only in basal-like
51	GO:0048856	anatomical structure development	21	3	1.91	51	0.284	0.284	overlapping with classical
52	GO:0006793	phosphorus metabolic process	12	2	1.09	52	0.298	0.298	only in basal-like
53	GO:0006796	phosphate-containing compound metabolic ...	12	2	1.09	53	0.298	0.298	only in basal-like
54	GO:0065009	regulation of molecular function	12	2	1.09	54	0.298	0.298	only in basal-like
55	GO:0071310	cellular response to organic substance	12	2	1.09	55	0.298	0.298	only in basal-like
56	GO:0071704	organic substance metabolic process	43	5	3.91	56	0.311	0.311	only in basal-like
57	GO:0051716	cellular response to stimulus	33	4	3	57	0.336	0.336	only in basal-like
58	GO:0051128	regulation of cellular component organiz...	13	2	1.18	58	0.337	0.337	overlapping with classical
59	GO:0002376	immune system process	13	2	1.18	59	0.337	0.337	overlapping with classical
60	GO:0008152	metabolic process	44	5	4	60	0.341	0.341	only in basal-like
61	GO:0006950	response to stress	23	3	2.09	61	0.346	0.346	only in basal-like
62	GO:0009893	positive regulation of metabolic process	14	2	1.27	62	0.375	0.375	only in basal-like
63	GO:0031325	positive regulation of cellular metaboli...	14	2	1.27	63	0.375	0.375	only in basal-like
64	GO:0019222	regulation of metabolic process	24	3	2.18	64	0.378	0.378	only in basal-like
65	GO:0019538	protein metabolic process	24	3	2.18	65	0.378	0.378	only in basal-like
66	GO:1901564	organonitrogen compound metabolic proces...	24	3	2.18	66	0.378	0.378	only in basal-like
67	GO:0032270	positive regulation of cellular protein ...	5	1	0.45	67	0.389	0.389	only in basal-like
68	GO:0120035	regulation of plasma membrane bounded ce...	5	1	0.45	68	0.389	0.389	only in basal-like
69	GO:0120036	plasma membrane bounded cell projection ...	5	1	0.45	69	0.389	0.389	only in basal-like
70	GO:0051346	negative regulation of hydrolase activit...	5	1	0.45	70	0.389	0.389	only in basal-like
71	GO:0031399	regulation of protein modification proce...	5	1	0.45	71	0.389	0.389	only in basal-like
72	GO:0042127	regulation of cell population proliferat...	5	1	0.45	72	0.389	0.389	only in basal-like
73	GO:0019220	regulation of phosphate metabolic proces...	5	1	0.45	73	0.389	0.389	only in basal-like
74	GO:0032535	regulation of cellular component size	5	1	0.45	74	0.389	0.389	overlapping with classical
75	GO:0019752	carboxylic acid metabolic process	5	1	0.45	75	0.389	0.389	only in basal-like
76	GO:0044093	positive regulation of molecular functio...	5	1	0.45	76	0.389	0.389	only in basal-like
77	GO:0030097	hemopoiesis	5	1	0.45	77	0.389	0.389	only in basal-like
78	GO:0048534	hematopoietic or lymphoid organ developm...	5	1	0.45	78	0.389	0.389	only in basal-like
79	GO:0022604	regulation of cell morphogenesis	5	1	0.45	79	0.389	0.389	only in basal-like
80	GO:0051174	regulation of phosphorus metabolic proce...	5	1	0.45	80	0.389	0.389	only in basal-like
81	GO:0032504	multicellular organism reproduction	5	1	0.45	81	0.389	0.389	only in basal-like
82	GO:0051094	positive regulation of developmental pro...	5	1	0.45	82	0.389	0.389	only in basal-like
83	GO:0006082	organic acid metabolic process	5	1	0.45	83	0.389	0.389	only in basal-like
84	GO:0090066	regulation of anatomical structure size	5	1	0.45	84	0.389	0.389	overlapping with classical
85	GO:0022008	neurogenesis	5	1	0.45	85	0.389	0.389	only in basal-like
86	GO:0009628	response to abiotic stimulus	5	1	0.45	86	0.389	0.389	only in basal-like
87	GO:0007267	cell-cell signaling	5	1	0.45	87	0.389	0.389	only in basal-like
88	GO:0043436	oxoacid metabolic process	5	1	0.45	88	0.389	0.389	only in basal-like
89	GO:0000902	cell morphogenesis	5	1	0.45	89	0.389	0.389	only in basal-like
90	GO:0071345	cellular response to cytokine stimulus	5	1	0.45	90	0.389	0.389	only in basal-like
91	GO:0048609	multicellular organismal reproductive pr...	5	1	0.45	91	0.389	0.389	only in basal-like
92	GO:0051247	positive regulation of protein metabolic...	5	1	0.45	92	0.389	0.389	only in basal-like
93	GO:0032502	developmental process	25	3	2.27	93	0.41	0.41	overlapping with classical
94	GO:0071840	cellular component organization or bioge...	26	3	2.36	94	0.443	0.443	only in basal-like
95	GO:0032501	multicellular organismal process	26	3	2.36	95	0.443	0.443	only in basal-like
96	GO:0016043	cellular component organization	26	3	2.36	96	0.443	0.443	only in basal-like
97	GO:0030030	cell projection organization	6	1	0.55	97	0.449	0.449	only in basal-like
98	GO:0043086	negative regulation of catalytic activit...	6	1	0.55	98	0.449	0.449	only in basal-like
99	GO:0040011	locomotion	6	1	0.55	99	0.449	0.449	only in basal-like
100	GO:0022414	reproductive process	6	1	0.55	100	0.449	0.449	only in basal-like
